# Supplementary material for: Treatments in Periorbital Hyperpigmentation: A Systematic Review and Single-Arm Meta- Analysis of Clinical Trials
Source: Research Square preprint supplement (doi:10.21203/rs.3.rs-7537721/v1), 2025-11-20
Supplement: Supplementary file 1 [file 7da750b02f39e2e47138b0f7.docx]

**Supplementary Material**

**Supplementary table 1. Search in PubMed**

| Boolean search | Results |
| --- | --- |
| ((Periorbital Hyperpigmentation[Title/Abstract]) OR (periorbital pigmentation[Title/Abstract]) OR (periorbital discoloration[Title/Abstract]) OR (periorbital darkening[Title/Abstract]) OR (dark circles[Title/Abstract]) OR (under-eye pigmentation[Title/Abstract]) OR (infraorbital pigmentation[Title/Abstract]) OR (periocular hyperpigmentation[Title/Abstract]) OR (periocular discoloration[Title/Abstract]) OR (periorbital melanosis[Title/Abstract]) OR ((idiopathic hyperchromia) AND (orbital[Title/Abstract])) OR (ICHOR[Title/Abstract]) ) AND ( (Platelet-Rich Plasma[MeSH Terms]) OR (platelet-rich plasma[Title/Abstract]) OR (PRP[Title/Abstract]) OR (autologous plasma[Title/Abstract]) OR (platelet concentrate[Title/Abstract]) OR (plasma-rich platelet[Title/Abstract]) OR (plasma rich in growth factor*[Title/Abstract]) OR (platele*[Title/Abstract]) OR (laser[Title/Abstract]) OR (lasers[Title/Abstract]) OR (laser therap*[Title/Abstract]) OR (laser treatment*[Title/Abstract]) OR (topical cream[Title/Abstract]) OR (topical agent[Title/Abstract]) OR (skin cream[Title/Abstract]) OR (depigmenting cream[Title/Abstract]) OR (serum[Title/Abstract]) OR (serums[Title/Abstract]) OR (skin serum[Title/Abstract]) OR (cosmeceutical[Title/Abstract]) OR (filler[Title/Abstract]) OR (fillers[Title/Abstract]) OR (dermal filler[Title/Abstract]) OR (injectable filler[Title/Abstract]) OR (chemical peel[Title/Abstract]) OR (chemoexfoliation[Title/Abstract]) OR (carboxytherapy[Title/Abstract]) OR (carbon dioxide therapy[Title/Abstract]) OR (blepharoplasty[MeSH Terms]) OR (blepharoplasty[Title/Abstract]) OR (eyelid surgery[Title/Abstract]) OR (normobaric oxygen[Title/Abstract]) OR (oxygen therapy[Title/Abstract]) OR (topical oxygen[Title/Abstract]) OR (placebo[MeSH Terms]) OR (placebo[Title/Abstract]) OR (sham treatment[Title/Abstract]) OR (sham therap[Title/Abstract]) OR (control group[Title/Abstract]) OR (Treatment [Title/Abstract]) ) | 233 |

**Supplementary table 2. Search in Embase**

| Boolean search | Results |
| --- | --- |
| ('periorbital hyperpigmentation':ti,ab OR 'periorbital pigmentation':ti,ab OR 'periorbital discoloration':ti,ab OR 'periorbital darkening':ti,ab OR 'dark circles':ti,ab OR 'under-eye pigmentation':ti,ab OR 'infraorbital pigmentation':ti,ab OR 'periocular hyperpigmentation':ti,ab OR 'periocular discoloration':ti,ab OR 'periorbital melanosis':ti,ab OR (idiopathic hyperchromia AND orbital:ti,ab) OR 'ICHOR':ti,ab) | 300 |

**Supplementary table 3. Search in Web of science**

| Boolean search | Results |
| --- | --- |
| TS=("periorbital hyperpigmentation" OR "periorbital pigmentation" OR "periorbital discoloration" OR "periorbital darkening" OR "dark circles" OR "under-eye pigmentation" OR "infraorbital pigmentation" OR "periocular hyperpigmentation" OR "periocular discoloration" OR "periorbital melanosis" OR ("idiopathic hyperchromia" AND orbital) OR ICHOR)  AND  TS=("platelet-rich plasma" OR PRP OR "autologous plasma" OR "platelet concentrate" OR "plasma-rich platelet" OR "plasma rich in growth factor*" OR platele* OR laser OR lasers OR "laser therap*" OR "laser treatment*" OR "topical cream" OR "topical agent" OR "skin cream" OR "depigmenting cream" OR serum OR serums OR "skin serum" OR cosmeceutical OR filler OR fillers OR "dermal filler" OR "injectable filler" OR "chemical peel" OR chemoexfoliation OR carboxytherapy OR "carbon dioxide therapy" OR blepharoplasty OR "eyelid surgery" OR "normobaric oxygen" OR "oxygen therapy" OR "topical oxygen" OR placebo OR "sham treatment" OR "sham therap*" OR "control group" OR treatment) | 231 |

**Supplementary table 5. Search in Google Schoolar**

| Boolean search | Results |
| --- | --- |
| ("periorbital hyperpigmentation" OR "dark circles" OR "periorbital pigmentation" OR "under-eye pigmentation" OR "periorbital melanosis") AND ("platelet-rich plasma" OR PRP OR laser OR "topical cream" OR "skin serum" OR filler OR "chemical peel" OR blepharoplasty OR placebo OR "oxygen therapy" OR treatment) | 200 |

**Supplementary table 5. Search in CINAHI**

| Boolean search | Results |
| --- | --- |
| (periorbital hyperpigmentation OR periorbital pigmentation OR periorbital discoloration OR periorbital darkening OR dark circles OR under-eye pigmentation OR infraorbital pigmentation OR periocular hyperpigmentation OR periocular discoloration OR periorbital melanosis OR (idiopathic hyperchromia AND orbital) OR ICHOR)  AND  (platelet-rich plasma OR PRP OR autologous plasma OR platelet concentrate OR plasma-rich platelet OR "plasma rich in growth factor*" OR platele* OR laser OR lasers OR "laser therap*" OR "laser treatment*" OR "topical cream" OR "topical agent" OR "skin cream" OR "depigmenting cream" OR serum OR serums OR "skin serum" OR cosmeceutical OR filler OR fillers OR "dermal filler" OR "injectable filler" OR "chemical peel" OR chemoexfoliation OR carboxytherapy OR "carbon dioxide therapy" OR blepharoplasty OR "eyelid surgery" OR "normobaric oxygen" OR "oxygen therapy" OR "topical oxygen" OR placebo OR "sham treatment" OR "sham therap*" OR "control group" OR treatment) | 10 |

**Supplementary table 6. Search in Cochrane**

| ID | Search Terms | Hits |
| --- | --- | --- |
| #1 | ("periorbital hyperpigmentation" OR "periorbital pigmentation" OR "periorbital discoloration" OR "periorbital darkening" OR "dark circles" OR "under-eye pigmentation" OR "infraorbital pigmentation" OR "periocular hyperpigmentation" OR "periocular discoloration" OR "periorbital melanosis" OR "idiopathic hyperchromia" OR ICHOR):ti,ab,kw | 116 |
| #2 | ("platelet-rich plasma" OR PRP OR "autologous plasma" OR "platelet concentrate" OR "plasma-rich platelet" OR "plasma rich in growth factor*" OR platele*):ti,ab,kw | 39671 |
| #3 | (laser OR lasers OR "laser therap*" OR "laser treatment*"):ti,ab,kw | 26238 |
| #4 | ("topical cream" OR "topical agent" OR "skin cream" OR "depigmenting cream" OR serum OR serums OR "skin serum" OR cosmeceutical):ti,ab,kw | 134556 |
| #5 | (filler OR fillers OR "dermal filler" OR "injectable filler"):ti,ab,kw | 1051 |
| #6 | ("chemical peel" OR chemoexfoliation OR carboxytherapy OR "carbon dioxide therapy"):ti,ab,kw | 134 |
| #7 | (blepharoplasty OR "eyelid surgery"):ti,ab,kw | 295 |
| #8 | ("normobaric oxygen" OR "oxygen therapy" OR "topical oxygen"):ti,ab,kw | 5544 |
| #9 | (placebo OR "sham treatment" OR "sham therap*" OR "control group" OR treatment):ti,ab,kw | 1299369 |
| #10 | MeSH descriptor: [Platelet-Rich Plasma] explode all trees | 1272 |
| #11 | MeSH descriptor: [Blepharoplasty] explode all trees | 131 |
| #12 | MeSH descriptor: [Placebos] explode all trees | 26662 |
| #13 | #2 OR #3 OR #4 OR #5 OR #6 OR #7 OR #8 OR #9 OR #10 OR #11 OR #12 | 1362940 |
| #14 | #1 AND #13 | 104 |

Supplementary table 6. Search in Scopus

| Boolean search | Results |
| --- | --- |
| (TITLE-ABS-KEY("periorbital hyperpigmentation" OR "periorbital pigmentation" OR "periorbital discoloration" OR "periorbital darkening" OR "dark circles" OR "under-eye pigmentation" OR "infraorbital pigmentation" OR "periocular hyperpigmentation" OR "periocular discoloration" OR "periorbital melanosis" OR ("idiopathic hyperchromia" AND orbital) OR ICHOR))  AND  (TITLE-ABS-KEY("platelet-rich plasma" OR PRP OR "autologous plasma" OR "platelet concentrate" OR "plasma-rich platelet" OR "plasma rich in growth factor*" OR platele* OR laser OR lasers OR "laser therap*" OR "laser treatment*" OR "topical cream" OR "topical agent" OR "skin cream" OR "depigmenting cream" OR serum OR serums OR "skin serum" OR cosmeceutical OR filler OR fillers OR "dermal filler" OR "injectable filler" OR "chemical peel" OR chemoexfoliation OR carboxytherapy OR "carbon dioxide therapy" OR blepharoplasty OR "eyelid surgery" OR "normobaric oxygen" OR "oxygen therapy" OR "topical oxygen" OR placebo OR "sham treatment" OR "sham therap*" OR "control group" OR treatment)) | 306 |

| **Supplementary Table 7. Interventions description and codes used in the analysis** | | | |
| --- | --- | --- | --- |
| Author | Intervention Type | Intervention Code | Intervention description |
| Yu C., et al. 2020 | Phenylethyl resorcinol gel+ nano-microneedle | Phenylethyl resorcinol + Microneedling | 1% topical PR gel (Symrise) on the infraorbital region (Gel application evenly and use of pen like vibrator on the surface of the skin for 1-2 seconds, repeated 5 times, once a day), and nano-microneedle (Suzhou Natong Biological Nanotechnology Corporation Ltd.)-assisted PR gel (applied twice a week with 3–4-day interval) |
| Phenylethyl resorcinol gel | Phenylethyl resorcinol | 1% topical PR gel (Symrise) on the infraorbital region (Gel application evenly and use of pen like vibrator on the surface of the skin for 1-2 seconds, repeated 5 times, once a day) |
| Placebo gel + nano-microneedle | Placebo + Microneedling | Gel without PR (Gel application evenly and use of pen like vibrator on the surface of the skin for 1-2 seconds, repeated 5 times, once a day) and similarly imported with nano-microneedle on the right side. |
| Placebo gel | Placebo | Gel without PR (Gel application evenly and use of pen like vibrator on the surface of the skin for 1-2 seconds, repeated 5 times, once a day. ) |
| Ranjan R., et al. 2016 | 4% hydroquinone | Hydroquinone | Patients were asked to apply 4% HQ cream during night in the infraorbital area |
| 30% salicylic acid peel | Salicylic acid | The peel was applied serially at 0, 2, 4, 6, 8, and 10 weeks after the test peel. About 30% of SA was applied with cotton tipped applicator in the infraorbital areas. |
| Hussein O., et al. 2021 | carboxytherapy 30 ml/min | Carboxytherapy | Patients received weekly sessions of carboxytherapy for six consecutive weeks. CO2 was delivered via a 32-gage needle inserted subcutaneously one cm below and lateral to the lateral canthus. Same rate in both eyes. |
| carboxytherapy 60 ml/min | Carboxytherapy high dose | Patients received weekly sessions of carboxytherapy for six consecutive weeks. CO2 was delivered via a 32-gage needle inserted subcutaneously one cm below and lateral to the lateral canthus. Same rate in both eyes. |
| Wu, X., et al. 2022 | Microneedle Fractional Radiofrequency | Microneedling | The periorbital areas were cleaned, and then a topical anesthetic mixture of 2.5% prilocaine and 2.5% prilocaine cream was applied 1 hour before treatment. In each session, patients were treated in two steps: unipolar mode was applied during the first step and bipolar mode in the second. |
| No treatment | Placebo | Control side; no treatment applied. |
| Nilforoushzadeh M., et al. 2020 | Fractional Er: YAG laser treatment and PRP | PRP + laser | Fractional long-pulse Er: YAG laser with energy of 500- 700 mJ + 3 ml activated PRP was injected into the right periorbital area by superficial microinjection. Then, activated PRP was used topically in the right side twice at 5 min intervals. |
| Fractional Er: YAG laser treatment | Laser + placebo | Fractional long-pulse Er: YAG laser with energy of 500 - 700 mJ + normal saline injected as placebo |
| Shalash, A., et al. 2023 | Bilateral injection of PRP gel | PRP | 10ml of venous blood was processed to obtain platelet-poor plasma (PRP), which was injected subcutaneously with a 23G cannula at the Naso Jugal fold. The area was massaged and cooled for 4- 6 hours to reduce bruising |
| Bilateral intradermal injection of CO2 with carboxytherapy machine | Carboxytherapy | Carboxytherapy was performed bilaterally using the CONCERTO device (BFP Elect Ronique, France) with a 32G needle, injecting along the lower orbital rim and lateral upper eyelid. |
| Intradermal injection of vitamin C | Vitamin C | Not described |
| Budania A., et al. 2020 | Novel PRP (SS and low- temperature activation) | PRP novel | Sixteen milliliters of venous blood mixed with 3.2% sodium citrate were centrifuged at 100 g for 10 minutes. The lower two-thirds of the plasma (PRP) was collected and activated by cooling at 4°C for 15 - 30 minutes, producing the final novel PRP preparation. |
| Conventional PRP (DS and calcium activation). | PRP | Sixteen milliliters of venous blood with 3.2% sodium citrate were processed using a double-spin method (160g then 400g). The platelet pellet was resuspended in plasma and activated with 10% calcium gluconate (1:9 ratio), forming conventional PRP. |
| Nilforoushzadeh M., et al. 2021 | Carboxy Therapy | Carboxytherapy | CO2 injections subcutaneously on both upper and lower periorbital skin. For carboxy therapy, an A30 G needle with an infusion velocity of 1 mL/s was used. In total., The average time of each session was 5-7 min. |
| Q-switched Nd: YAG laser. | Laser | Fractional 10,64 nm Q-switched Nd: YAG laser. Before the process, the treatment area was cleansed, followed by the application of a topical anesthetic cream (PEMLA, 15 ml of 2.5 % lidocaine with 2.5 % prilocaine) for 50 min. |
| Dayal S., et al. 2019 | 20% glycolic acid peeling | Glycolic acid | Peeling was performed as per the basic guidelines of chemical peeling. |
| 15% lactic acid peeling | Lactic acid | Peeling was performed as per the basic guidelines of chemical peeling. |
| 12% ferulic acid peeling | Ferulic acid | Peeling was performed as per the basic guidelines of chemical peeling. |
| Kadry A., et al. 2023 | Platelet-Rich Plasma | PRP | Ten milliliters of blood were drawn with sodium citrate (10:1) and processed using Tubex tubes and Selex centrifuge (1500 rpm 10min, then 4000 rpm — 10min). The lower 1mL PRP layer was collected and activated with calcium chloride (10:1) immediately before injection. |
| Autologous Fat | Fat transfer | Tumescent anesthesia (saline, lidocaine, adrenaline, NaHCO3) was used. Fat was harvested from the lower abdomen or inner thigh using low-pressure suction (Coleman method) and centrifuged at 1000 rpm for 2min. Microfat was washed, then used to fill the nasojugal and palpebromalar grooves supraperiosteally with a 0.7-mm blunt cannula, followed by superficial nanofat injection with a 27G needle. Overinjection was performed to compensate for expected fat loss. Nanofat was obtained by emulsifying microfat between syringes for 3min and filtering. |
| Khan I., et al. 2023 | Platelet-Rich Plasma | PRP | Platelet-rich plasma (PRP) was prepared using a double-spin method from 10mL of venous blood with trisodium citrate. The first spin (150-200g, 10 min) separated platelets from blood cells, and the second (1500- 2000 g, 15 min) isolated PRP, achieving a 3-4 times higher concentration than hole blood. PRP was activated with calcium chloride (0.1 mL per 0.9 mL PRP) and injected intradermally into the periorbital area (1 cm below the eyelid, 1.5 – 2 mm deep, spaced 1 cm apart) using an insulin syringe. |
| Carboxy Therapy | Carboxytherapy | A 5cc injection of CO2 was supplied to each eyelid, precisely targeting the one-third lateral area. This was done using a 30-gauge needle with an injection rate of 50 cc per minute. |

| Iranmanesh B., et al. 2024 | Intradermal injection of PRP | PRP | PRP was prepared with 10 mL of the patient's venous blood sample was taken manually with a sterile 10 mL syringe and then centrifuged with 1800 G/6 min, buffy coat and plasma were then extracted and re-­ centrifuged with 2500 G/15 min. |
| --- | --- | --- | --- |
| Intradermal injection of tranexamic acid + Vitamin C | Tranexamic acid + Vitamin C | For mesotherapy, 0.5 mL of tranexamic acid (500 mmg/5 mL Caspian Tamin pharmaceutical company) + 0.5 mL vitamin C solution (500 mg/5 Alborz Daru com-pany) was injected intradermally on the other side of the face in the infraorbital area. |
| Zaheri H., et al. 2022 | Sub-cutaneous or intradermal injection of pure carbon dioxide as carboxytherapy | Carboxytherapy | Sub-cutaneous or intradermal injection of pure carbon dioxide at the volume of 5 ml was administered to the PDC of one side of patient's face as carboxytherapy |
| Fractional CO2 laser therapy | CO2 Laser | Fractional CO2 laser therapy was employed to the PDC of other side of the same person. |
| Fabi S., et al. | VYC-15L | VYC-15L | VYC-15L was injected in the submuscular/supraperiosteal plane by either a 32G 1⁄2-inch needle or a 27G 11⁄2-inch cannula to the infraorbital and adjacent area |
| Placebo | Placebo | optional treatment at the end of the no-treatment control period. |
| Ohshima H, et al. | 10% sodium ascorbate (ANa) lotion | Sodium Ascorbate (ANa) Group | Each group was administered either form of vitamin C in split-faced for 6 months. Apply about 0.3 mL of vitamin C lotion and vehicle by different fingers (or with different pieces of cotton) twice daily (morning and evening) |
| the base lotion without the active vitamin C ingredient | Vehicle-Only Control Group | The base lotion without the active vitamin C ingredient |
| 10% ascorbic acid glucoside (AG) lotion | Ascorbic Acid Glucoside (AG) Group | The lotion was applied twice daily (morning and evening), about 0.3 mL, using different fingers or cotton pieces |
| the base lotion without the active vitamin C ingredient | Vehicle-Only Control Group | The base lotion without the active vitamin C ingredient |

| Assaf H,. et al. 2022 | Carboxytherapy (Right periorbital area) | Carboxytherapy | Carboxytherapy method at the Right (Rt) side of the face followed by MN using dermapen. Carbon dioxide (CO2) gas was intra‐dermally/subcutaneously injected at the lateral one‐third of each eyelid (about 5 cc gas in each puff according to standardized flowmeter) using an insulin syringe. Each patient received 4‐6 puffs/ session. |
| --- | --- | --- | --- |
| Microneedling with topical Glutathione (Left periorbital area) | Microneedling+Glutathione | Topical glutathione at the Left (Lt) side of the face. Topical application of glutathione (Medical Cure Company, Spain) with vial concentration: 600 mg/5 ml. About 0.25 ml/session of glutathione was used. |
| Ghandehari,R., et al.2020 | CO2 laser + Tranexamic acid | Tranexamic acid + CO2 laser | On one side of the infraorbital region, one side with fractional CO2 laser. For fractional resurfacing was CO2 Laser 10600 nm (MIXEL; Hironic Co.,Ltd, Gyeonggi, Korea). We applied fluences of 10 to 15 mJ/cm2, 0.8 mm distance, overlap 1 step, and repeat 1 second with scatter mode; two passes were performed on the treated area. Immediately after laser or microneedling procedure, 2 cc of tranexamic acid (500mg/5ml) vial (Caspian Tamin, Rasht, Iran) applied to the treatment area with a cotton swab, waiting until the drug completely absorbed. Then the treatment area was covered with zinc oxide ointment, patients were instructed about post-laser therapy care and sun protection |
| Microneedling + Tranexamic acid | Tranexamic acid+Microneedling | The other side with microneedling. Treatment of the contralateral side, we used microneedling (Dermapen, 3Medgroup, Tehran, Iran). The cartridges were single-use containing 12 sterile needles. The following needle depths were used to achieve pinpoint bleeding: 0.5 to 1 millimeter. The frequency of the needle stroke was from 100 to 150Hz. The needle cartridge was then moved in a circular pattern three passes over the treated area. Immediately after laser or microneedling procedure, 2 cc of tranexamic acid (500mg/5ml) vial (Caspian Tamin, Rasht, Iran) applied to the treatment area with a cotton swab, waiting until the drug completely absorbed. Then the treatment area was covered with zinc oxide ointment |
| Behrangi E, et al.2022 | Fractional CO2 laser therapy | CO2 Laser | SmartXide DOT/ DEKA fractional CO2 laser apparatus made by Italy, with a power of 10, stack of 2, and a density of 1. |
| Fractional CO2 laser + PRP treatments | PRP+laser | SmartXide DOT/ DEKA fractional CO2 laser apparatus made by Italy, with a power of 10, stack of 2, and a density of 1. + A 5 ml venous blood sample was extracted and diluted with 1.5 ml of Adenine Dextrose Citric Acid (ADCA) solution. Then, the solution was centrifuged (4000 rpm), and 2 ml of PRP was extracted. Finally, 1 ml of PRP solution was injected in each side of the POH area immediately after CO2 laser exposure. In each pint, we injected 0.05-0.1 ml of PRP by a distance of 0.5-1 millimeter. |
| Ellabban N., et al.2019 | A peeling agent consisted of combined TCA 3.75% and lactic acid (LA) 15% in a gel formula | TCA+Lactic acid | Four layers of the peel were applied to each infraorbital area. The first layer was applied starting from the most intense area of hyperpigmentation. The duration of the first three layers ranged between 1 and 2 min, and the last layer was about 5 min with a session duration ranged between 8 and 11 min. |
| Autologous PRP injections | PRP | Ten milliliter (mL) of whole blood was withdrawn from each patient and collected in a sterile tube containing 1 mL anticoagulant(trisodium citrate). The resulting PRP was aspirated, and 0.1 mL of calcium chloride was added for each 0.9 mL of PRP for platelets activation and then injected into the selected area using insulin syringe needle for superficial microinjection. |
| Kadry A, et al. 2023 | Platelet-rich plasma | PRP | All blood samples (10 mL) were drawn from the participants medial cubital vein and collected in a sterile tube containing 1 mL sodium citrate (10:1) as an anticoagulant. The tubes were then subjected to 2 centrifugation steps. The initial centrifugation at 1,500 revolutions per minute (rpm) for 10 minutes in a centrifugal apparatus. the lower 1 mL of the plasma(10% of the initial volume of autologous blood) was yielded as PRP concentrate after centrifugation. Finally, the PRP was activated by adding calcium chloride at a ratio of 10:1(0.1 cm of CaCl2 to each 1 cm of PRP) immediately before the injection. Once PRP is activated, it should be injected rapidly within 10 minutes. |
| Autologous fat transfer with emulsified fat injection | Fat transfer | The preferred areas for fat collection are the lower abdomen and inner thigh, because they were shown to be rich in stem cells. Fat was collected using the Coleman19 method. In brief, low negative pressure suction (20 mL reserved air method) was applied to the preferred area using a 20-mL syringe, then the collected fat was centrifuged at low speed (1,000 rpm for 2 minutes). Liposuction was performed using a 3.5-mm polyporous specific needle. Emulsification was achieved by transferring the fat between 2 20-mL syringes connected to each other by a female-to-female Luer-Lok connector for 3 minutes until it becomes whitish. In a single session, the microfat was used first to fill the nasojugal and palpebromalar grooves by injecting the fat in the supraperiosteal plane using a 0.7-mm blunt cannula. |
| Nofal E. et al. 2018 | Platelet rich plasma | PRP | PRP was prepared from 10 mL of the patient's own venous blood using a double-spin method to concentrate platelets 3-4 times more than whole blood. The PRP was then activated by adding 0.1 mL of calcium chloride to 0.9 mL of PRP immediately before injection |
| Carboxy Therapy | Carboxytherapy | CO2 gas was intradermally injected at the lateral one-third of each eyelid using a 30 G needle. 5 cc of gas was administered in each "puff," with an infusion velocity of 50 mL/min. Compression of the injected area was avoided to prevent rapid gas leakage |
| Ahmadraji F., et al. 2015 | Emu oil+ vitamin k+ caffeine | Emu oil+ vitamin k+ caffeine | This pad consisted of 3% w/w caffeine and 1% vitamin K12 within an emulsified Emu oil base. The full composition for 100g of the formulation included:Oily phase: 10g Emu oil, 1g Vitamin K, 2.6g Glycerin monostearate7.  Water phase: 3g Caffeine, 2g sodium benzoate, 6g glycerin, 1.3g Tween 20, 7.8g ethanol, and 65.11g water |
| Placebo water pad | Placebo water pad | Cotton pad with water |
| Hamdi H., et al. 2022 | artemissian extract eye cream | Artemissian | The base cream formula (excluding the active extract) included components such as paraffin oil (5% w/w), cetyl alcohol (5% w/w), Tween 80 (0.5% w/w), Span 20 (0.5% w/w), Carbomer (0.8% w/w), Sepigel (10% w/w), methylparaben (0.18% w/w), propylparaben (0.02% w/w), propylene glycol (5% w/w), and water (up to 100% w/w) |
| placebo eye cream | Placebo | The placebo cream was prepared using the same base as the active cream (excluding the *Artemisia absinthium L.* extract). To maintain blinding, a brown color (Khat e Zard brand) was added to make it visually similar to the drug cream. Additionally, a small amount of *A. absinthium* essential oil was rubbed on the placebo cream cap to mimic the smell of the active product. Both the drug and placebo creams were designed to be "quite similar in appearance, color, and smell" |
| Lu Y., et al. 2024 | PRP injection after Q-switched ruby laser treatment (combined group) | PRP+Laser | Laser: The laser was set to QSW mode, with a spot size of Pixel 5x5. The power was 22–24 mJ/Pixel, adjusted according to the patient's skin type (higher power for lighter skin), and the frequency was 1.0 Hz  PRP: The goal was to achieve a final platelet concentration of approximately (1000 ± 20%) × 10^9/L, which is about three to five times that of normal plasma |
| Q-switched ruby laser only (control group) | Laser | The laser was set to QSW mode, with a spot size of Pixel 5x5. The power was 22–24 mJ/Pixel (adjusted according to skin type, higher power for lighter skin), and the frequency was 1.0 Hz |
| Asilian A., et al. 2019 | Carboxytherapy | Carboxytherapy | Each injection involved 5 cubic centimeters (cc) of CO2 gas, delivered at a velocity of 50 cc per minute. he injections were performed at the one-third lateral part of each eyelid |
| Platelet Rich Plasma | PRP | The prepared PRP was then transferred to a 1-ml insulin syringe and activated by adding 0.1 ml of calcium chloride to 0.9 ml of PRP. Each injection point involved 0.2-0.3 cc of PRP, injected at a depth of 1.5-2 mm |
| El-­ Tahlawi S., et al. 2022 | Platelet-Rich Plasma (PRP) injections | PRP | The PRP was prepared using a double spin method from the patient's own venous blood. The activated PRP was injected into the papillary dermis of the right periorbital area |
| Carboxytherapy | Carboxytherapy | A total amount of 1–2 ml of gas was administered with a flow rate of 1 cc/s. The injections were performed in the lateral left periorbital área |
| Afzal N., et al. 2024 | THDA + AZ group | Topical combination of Tetrahexyldecyl ascorbate (THDA) 5% + Acetyl zingerone (AZ) 1% | This group received a topical formulation containing 5% Tetrahexyldecyl Ascorbate (THDA) and 1% Acetyl Zingerone (AZ) which was applied directly to the skin surface. |
| THDA only group | Tetrahexyldecyl ascorbate (THDA) 5% only | Tetrahexyldecyl ascorbate (THDA) 5% only was applied directly to the skin. |
| Phoo Mon N., et al. 2025 | Andrographis paniculata extract cream group | 2% Andrographis paniculata extract cream | Participants applied the cream to the periorbital areas (around the eyes, including crow's feet and under-eye regions) of one side of their face |
| Placebo Group | Standard base cream (placebo) | This intervention involved a standard base cream (placebo) was applied of one side of their face |
| Roohaninasab M., et al. 2024 | Case Group: Nanofat + SVF Group | Nanofat + Stromal Vascular Fraction (SVF) Injection | To prepare SVF, 20–30 cc of fat was harvested from the lower abdomen or thigh. The fat tissue was processed by adding PBS, centrifuging, discarding the supernatant, and then incubating with collagenase type I. The enzyme was neutralized, and the solution was centrifuged again. Approximately 3–6 cc of the resulting SVF solution was transferred to 1 cc syringes with a 30-gauge needle. 0.1 cm³ of SVF was injected intradermally at sites 1 cm apart on the scalp after ring blockade with injectable lidocaine |
| Case Group: Nanofat + PRP | Nanofat + Platelet-Rich Plasma (PRP) Injection | 20 cc of blood was drawn from the cubital vein. An anticoagulant (ACDA) was added (1:10 ratio). The mixture was centrifuged twice to concentrate the platelets: first at 1500 RPM for 10 min to separate platelet-poor plasma (PPP) and a buffy coat from red blood cells, and then the PPP and buffy coat were centrifuged again at 1200 RPM for 5 min for final concentration. Approximately 5-6 cc of the obtained PRP was transferred to 1 cc syringes with a 30-gauge needle. 0.1 cc of PRP was injected intradermally at each point, with points spaced approximately one centimeter apart after ring block local anesthesia with lidocaine |
| Case Group: Nanofat + Nd:YAG laser | Nanofat + 1064-nm Q-switched Nd:YAG Laser | Patients were treated with a long-pulsed 1064-nm Q-switched Nd:YAG laser (Helios 2) using specific parameters: spot size of 3 mm, frequency of 5 Hz, energy of 150–250 mJ, and fluence of 1–2 J/cm² |
| Control Group | Nanofat only | Fat was harvested from the lower abdomen or thigh (20–30 cc) using local tumescent anesthesia. The fat tissue was then transferred to a 50-mL tube, mixed with Phosphate-buffered saline (PBS), centrifuged, and the supernatant discarded. While the source details the SVF isolation process, the nanofat injection itself involves processing the fat tissue into a liquid form suitable for injection, which is implied as the base treatment for all groups. |
| Ahmed N., et al. 2018 | Group A | Carboxy Therapy | CO2 was injected intradermally and subcutaneously into specific sites on both the upper and lower eyelids bilaterally |
| Group B | Chemical Peel | A combination of lactic acid (LA, 15%) and trichloroacetic acid (TCA, 3.75%) was applied |
| Group C | Vitamin C Mesotherapy | An insulin syringe (30G LUER 0.30 x 4 mm needle) was used for intraepidermal injection. Vitamin C (comprising ascorbic acid, aqua/water, disodium EDTA) was extracted from an ampule. Approximately 10 mL was injected into both lower eyelids (5 mL for each eye) |

**Supplementary figure 1. Risk of bias assessment**


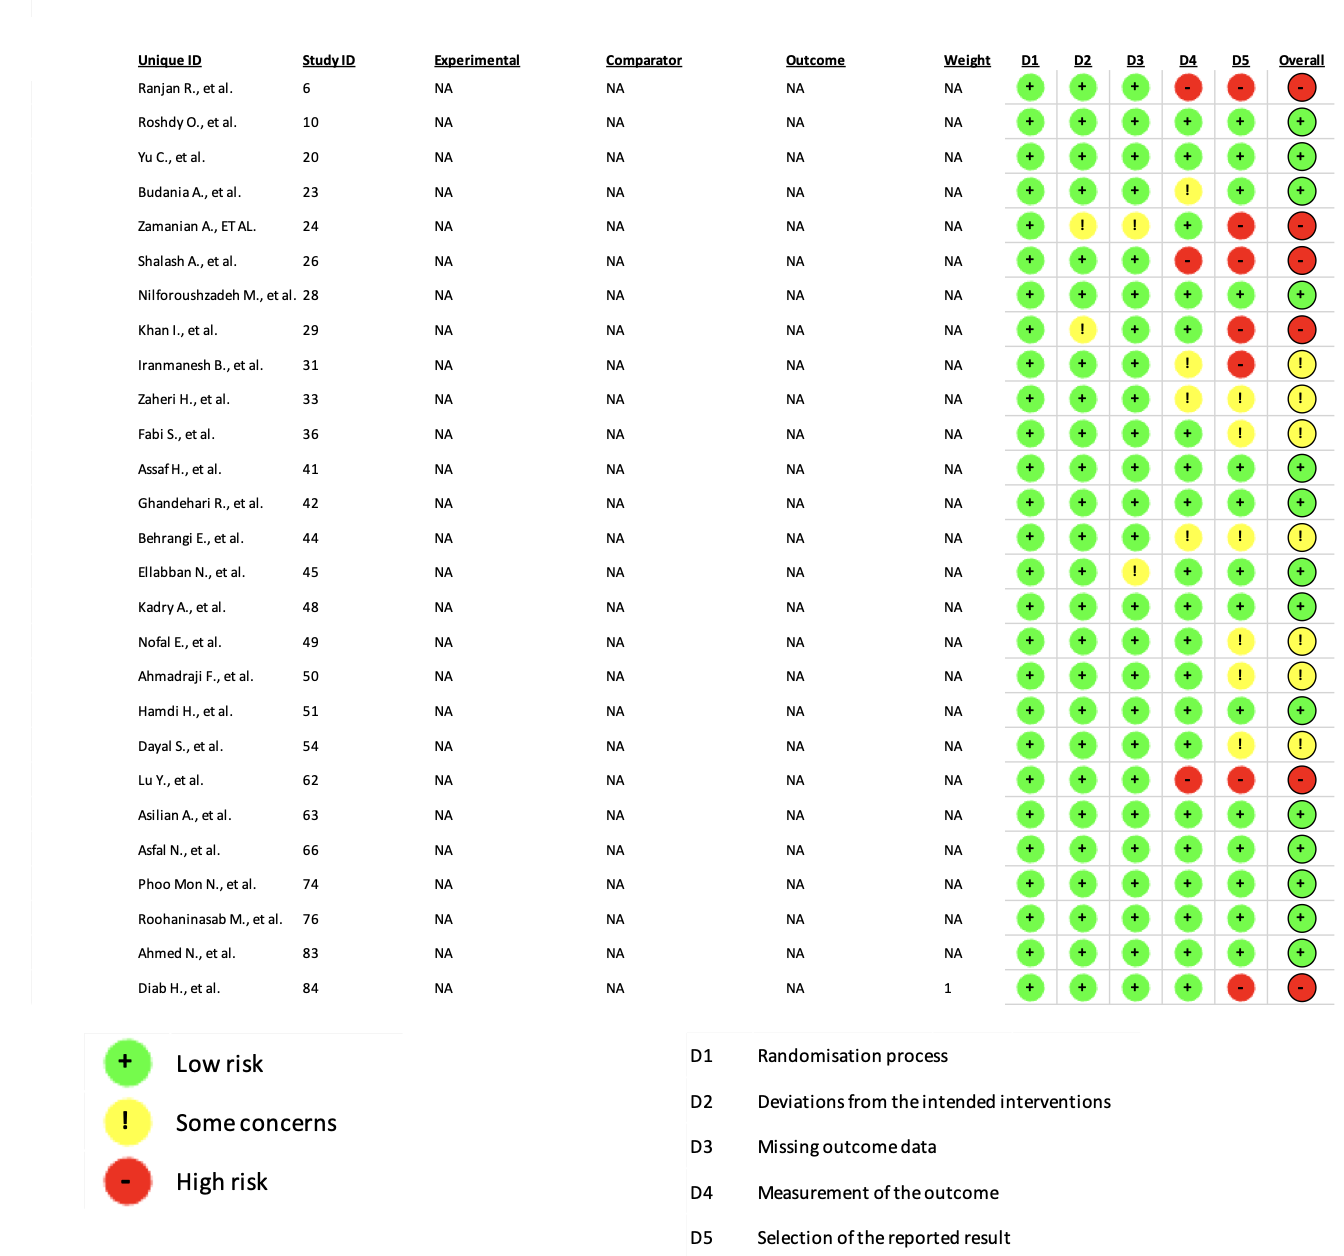


**PRISMA 2020 checklist**

| **Section and Topic** | **Item #** | **Checklist item** | **Location where item is reported** |
| --- | --- | --- | --- |
| **TITLE** | | |  |
| Title | 1 | Identify the report as a systematic review. | 1 |
| **ABSTRACT** | | |  |
| Abstract | 2 | See the PRISMA 2020 for Abstracts checklist. | 2-3 |
| **INTRODUCTION** | | |  |
| Rationale | 3 | Describe the rationale for the review in the context of existing knowledge. | 4-5 |
| Objectives | 4 | Provide an explicit statement of the objective(s) or question(s) the review addresses. | 4-5 |
| **METHODS** | | |  |
| Eligibility criteria | 5 | Specify the inclusion and exclusion criteria for the review and how studies were grouped for the syntheses. | 5-6 |
| Information sources | 6 | Specify all databases, registers, websites, organisations, reference lists and other sources searched or consulted to identify studies. Specify the date when each source was last searched or consulted. | 6 |
| Search strategy | 7 | Present the full search strategies for all databases, registers and websites, including any filters and limits used. | 6 |
| Selection process | 8 | Specify the methods used to decide whether a study met the inclusion criteria of the review, including how many reviewers screened each record and each report retrieved, whether they worked independently, and if applicable, details of automation tools used in the process. | 6-7 |
| Data collection process | 9 | Specify the methods used to collect data from reports, including how many reviewers collected data from each report, whether they worked independently, any processes for obtaining or confirming data from study investigators, and if applicable, details of automation tools used in the process. | 6-7 |
| Data items | 10a | List and define all outcomes for which data were sought. Specify whether all results that were compatible with each outcome domain in each study were sought (e.g. for all measures, time points, analyses), and if not, the methods used to decide which results to collect. | 5-7 |
| 10b | List and define all other variables for which data were sought (e.g. participant and intervention characteristics, funding sources). Describe any assumptions made about any missing or unclear information. | 5-7 |
| Study risk of bias assessment | 11 | Specify the methods used to assess risk of bias in the included studies, including details of the tool(s) used, how many reviewers assessed each study and whether they worked independently, and if applicable, details of automation tools used in the process. | 7 |
| Effect measures | 12 | Specify for each outcome the effect measure(s) (e.g. risk ratio, mean difference) used in the synthesis or presentation of results. | 7 |
| Synthesis methods | 13a | Describe the processes used to decide which studies were eligible for each synthesis (e.g. tabulating the study intervention characteristics and comparing against the planned groups for each synthesis (item #5)). | 6 |
| 13b | Describe any methods required to prepare the data for presentation or synthesis, such as handling of missing summary statistics, or data conversions. | 7 |
| 13c | Describe any methods used to tabulate or visually display results of individual studies and syntheses. | 27-28 |
| 13d | Describe any methods used to synthesize results and provide a rationale for the choice(s). If meta-analysis was performed, describe the model(s), method(s) to identify the presence and extent of statistical heterogeneity, and software package(s) used. | 7 |
| 13e | Describe any methods used to explore possible causes of heterogeneity among study results (e.g. subgroup analysis, meta-regression). | 7 |
| 13f | Describe any sensitivity analyses conducted to assess robustness of the synthesized results. | 8 |
| Reporting bias assessment | 14 | Describe any methods used to assess risk of bias due to missing results in a synthesis (arising from reporting biases). | 7 |
| Certainty assessment | 15 | Describe any methods used to assess certainty (or confidence) in the body of evidence for an outcome. | - |
| **RESULTS** | | |  |
| Study selection | 16a | Describe the results of the search and selection process, from the number of records identified in the search to the number of studies included in the review, ideally using a flow diagram. | 8 |
| 16b | Cite studies that might appear to meet the inclusion criteria, but which were excluded, and explain why they were excluded. | 8 |
| Study characteristics | 17 | Cite each included study and present its characteristics. | 21-26 |
| Risk of bias in studies | 18 | Present assessments of risk of bias for each included study. | 9 |
| Results of individual studies | 19 | For all outcomes, present, for each study: (a) summary statistics for each group (where appropriate) and (b) an effect estimate and its precision (e.g. confidence/credible interval), ideally using structured tables or plots. | 9-12 |
| Results of syntheses | 20a | For each synthesis, briefly summarise the characteristics and risk of bias among contributing studies. | 8-9 |
| 20b | Present results of all statistical syntheses conducted. If meta-analysis was done, present for each the summary estimate and its precision (e.g. confidence/credible interval) and measures of statistical heterogeneity. If comparing groups, describe the direction of the effect. | 9-12 |
| 20c | Present results of all investigations of possible causes of heterogeneity among study results. | 9-12 |
| 20d | Present results of all sensitivity analyses conducted to assess the robustness of the synthesized results. | 8-12 |
| Reporting biases | 21 | Present assessments of risk of bias due to missing results (arising from reporting biases) for each synthesis assessed. | 9-12 |
| Certainty of evidence | 22 | Present assessments of certainty (or confidence) in the body of evidence for each outcome assessed. | - |
| **DISCUSSION** | | |  |
| Discussion | 23a | Provide a general interpretation of the results in the context of other evidence. | 12-13 |
| 23b | Discuss any limitations of the evidence included in the review. | 13-14 |
| 23c | Discuss any limitations of the review processes used. | 13-14 |
| 23d | Discuss implications of the results for practice, policy, and future research. | 12-14 |
| **OTHER INFORMATION** | | |  |
| Registration and protocol | 24a | Discuss implications of the results for practice, policy, and future research. | 15 |
| 24b | Indicate where the review protocol can be accessed, or state that a protocol was not prepared. | 5 |
| 24c | Describe and explain any amendments to information provided at registration or in the protocol. | - |
| Support | 25 | Describe sources of financial or non-financial support for the review, and the role of the funders or sponsors in the review. | 14-15 |
| Competing interests | 26 | Declare any competing interests of review authors. | 15 |
| Availability of data, code and other materials | 27 | Report which of the following are publicly available and where they can be found: template data collection forms; data extracted from included studies; data used for all analyses; analytic code; any other materials used in the review. | 14-15 |

*From:*  Page MJ, McKenzie JE, Bossuyt PM, Boutron I, Hoffmann TC, Mulrow CD, et al. The PRISMA 2020 statement: an updated guideline for reporting systematic reviews. BMJ 2021;372:n71. doi: 10.1136/bmj.n71
